# Supplementary material for: Assessment of acute bone loading in humans using [18F]NaF PET/MRI
Source: Springer Nature journal article supplement (doi:10.1007/s00259-019-04424-2), 2019-08-05
Supplement: MOESM1 [file 17039080]

## Parametric values for [18F]NaF kinetics of the knee at rest and after exercise

| <u>Rest</u>                                             | Patella -<br>Subchondral | Femur-<br>Subchondral | Tibia-<br>Subchondral | Tendon<br>insert      | Femur-<br>Cortical<br>(Shaft) | Tibia-<br>Cortical<br>(Shaft) | Femur-<br>Trabecular  | Tibia-<br>Trabecular  |
|---------------------------------------------------------|--------------------------|-----------------------|-----------------------|-----------------------|-------------------------------|-------------------------------|-----------------------|-----------------------|
| <b>SUV</b>                                              | 0.7 (0.43 -<br>1.02)     | 0.52 (0.38<br>- 0.94) | 0.52 (0.37<br>- 0.85) | 0.89 (0.58<br>- 1.14) | 0.78 (0.55<br>- 1.03)         | 0.84 (0.7 -<br>0.91)          | 0.4 (0.27 -<br>0.79)  | 0.52 (0.35<br>- 0.71) |
| <b>SUV<sub>max</sub></b>                                | 1.93 (1.18<br>- 2.59)    | 2.49 (1.91<br>- 3.11) | 1.98 (1.35<br>- 2.54) | 3.0 (2.09 -<br>4.6)   | 3.12 (2.51<br>- 3.62)         | 2.24 (1.91<br>- 2.8)          | 1.35 (0.85<br>- 1.73) | 1.4 (1.12 -<br>1.63)  |
| <b>K<sub>i</sub><sup>NLR</sup></b><br>mL/min/100mL      | 0.81 (0.44<br>- 1.09)    | 0.56 (0.43<br>- 1.0)  | 0.6 (0.4 -<br>0.93)   | 1.07 (0.72<br>- 1.4)  | 0.82 (0.61<br>- 1.1)          | 0.87 (0.76<br>- 0.98)         | 0.43 (0.27<br>- 0.82) | 0.58 (0.41<br>- 0.81) |
| <b>K<sub>1</sub></b><br>mL/min/100mL                    | 0.86 (0.52<br>- 1.13)    | 0.66 (0.47<br>- 1.17) | 0.64 (0.41<br>- 1.04) | 1.29 (0.74<br>- 1.6)  | 1.67 (1.22<br>- 2.42)         | 1.88 (1.34<br>- 2.19)         | 0.44 (0.29<br>- 0.94) | 0.67 (0.46<br>- 1.11) |
| <b>k<sub>3</sub>/<br/>(k<sub>3</sub>+k<sub>2</sub>)</b> | 0.97 (0.91<br>- 0.99)    | 0.95 (0.92<br>- 0.97) | 0.98 (0.92<br>- 0.99) | 0.95 (0.9 -<br>0.96)  | 0.51 (0.43<br>- 0.61)         | 0.48 (0.41<br>- 0.56)         | 0.98 (0.94<br>- 0.99) | 0.89 (0.78<br>- 0.98) |
| <b>K<sub>i</sub><sup>pat</sup></b><br>mL/min/100mL      | 0.69 (0.38<br>- 0.99)    | 0.51 (0.33<br>- 0.9)  | 0.5 (0.34 -<br>0.81)  | 0.94 (0.64<br>- 1.31) | 0.62 (0.48<br>- 0.95)         | 0.67 (0.58<br>- 0.77)         | 0.38 (0.23<br>- 0.73) | 0.49 (0.33<br>- 0.63) |
| <b>Perf</b><br>mL/min/100mL                             | 0.86 (0.52<br>- 1.13)    | 0.66 (0.47<br>- 1.17) | 0.64 (0.41<br>- 1.04) | 1.29 (0.74<br>- 1.6)  | 1.67 (1.22<br>- 2.42)         | 1.88 (1.34<br>- 2.19)         | 0.44 (0.29<br>- 0.94) | 0.67 (0.46<br>- 1.11) |
| <b>Blood<br/>(%vol)</b>                                 | 0.04 (0.03<br>- 0.06)    | 0.07 (0.05<br>- 0.13) | 0.05 (0.03<br>- 0.07) | 0.05 (0.04<br>- 0.06) | 0.38 (0.22<br>- 0.64)         | 0.35 (0.27<br>- 0.48)         | 0.06 (0.04<br>- 0.08) | 0.09 (0.06<br>- 0.12) |

Supplementary Table 1 **Parametric values for bone tissues of the patella, tibia and femur at rest.**

*Median parametric values from different bone tissue with interquartile range in parenthesis. Measures are further divided into the tibial, femoral and patellar bones.*

| <u>Post-Exercise</u>                                    | <b>Patella</b>        | <b>Femur-Subchondral</b> | <b>Tibia-Subchondral</b> | <b>Femur-Shaft</b>    | <b>Tibia-Shaft</b>    | <b>Femur-Trabecular</b> | <b>Tibia-Trabecular</b> | <b>Tendon insert</b>  |
|---------------------------------------------------------|-----------------------|--------------------------|--------------------------|-----------------------|-----------------------|-------------------------|-------------------------|-----------------------|
| <b>SUV</b>                                              | 2.34<br>(1.16 - 3.23) | 1.2<br>(0.96 - 1.9)      | 1.2<br>(1.04 - 1.72)     | 1.26<br>(0.88 - 1.42) | 1.13<br>(0.94 - 1.33) | 1.03<br>(0.79 - 1.45)   | 1.03<br>(0.87 - 1.36)   | 1.8<br>(1.21 - 2.54)  |
| <b>SUV<sub>max</sub></b>                                | 6.11<br>(3.55 - 7.89) | 4.9<br>(3.95 - 7.82)     | 4.52<br>(4.08 - 4.79)    | 4.28<br>(3.59 - 5.17) | 3.21<br>(2.48 - 4.44) | 2.5<br>(2.12 - 2.95)    | 2.53<br>(1.75 - 3.09)   | 5.94<br>(4.49 - 10.1) |
| <b>K<sub>i</sub><sup>NLR</sup></b><br>mL/min/100mL      | 1.83<br>(1.22 - 2.89) | 1.15<br>(0.81 - 1.67)    | 1.22<br>(0.89 - 1.63)    | 1.03<br>(0.92 - 1.27) | 0.99<br>(0.81 - 1.15) | 0.99<br>(0.7 - 1.36)    | 0.96<br>(0.86 - 1.23)   | 2.14<br>(1.43 - 2.8)  |
| <b>K<sub>1</sub></b><br>mL/min/100mL                    | 2.93<br>(1.87 - 4.68) | 1.64<br>(1.26 - 2.64)    | 1.77<br>(1.3 - 2.55)     | 2.62<br>(2.23 - 3.71) | 3.85<br>(2.99 - 4.77) | 1.58<br>(0.9 - 2.33)    | 1.71<br>(1.41 - 3.06)   | 3.71<br>(2.0 - 4.01)  |
| <b>k<sub>3</sub>/<br/>(k<sub>3</sub>+k<sub>2</sub>)</b> | 0.63<br>(0.55 - 0.9)  | 0.75<br>(0.56 - 0.85)    | 0.71<br>(0.53 - 0.91)    | 0.4<br>(0.32 - 0.47)  | 0.24<br>(0.2 - 0.37)  | 0.76<br>(0.53 - 0.94)   | 0.58<br>(0.38 - 0.89)   | 0.7<br>(0.52 - 0.84)  |
| <b>K<sub>i</sub><sup>pat</sup></b><br>mL/min/100mL      | 1.63<br>(1.08 - 2.5)  | 0.98<br>(0.66 - 1.39)    | 0.98<br>(0.76 - 1.28)    | 0.84<br>(0.73 - 1.02) | 0.77<br>(0.64 - 0.92) | 0.83<br>(0.6 - 1.11)    | 0.82<br>(0.68 - 1)      | 1.7<br>(1.26 - 2.19)  |
| <b>Perf</b><br>mL/min/100mL                             | 2.93<br>(1.87 - 4.68) | 1.64<br>(1.26 - 2.64)    | 1.77<br>(1.3 - 2.55)     | 2.62<br>(2.23 - 3.71) | 3.85<br>(2.99 - 4.77) | 1.58<br>(0.9 - 2.33)    | 1.71<br>(1.41 - 3.06)   | 3.71<br>(2.0 - 4.01)  |
| <b>Blood (%vol)</b>                                     | 1.05<br>(0.72 - 1.36) | 0.94<br>(0.83 - 1.57)    | 0.86<br>(0.74 - 1.38)    | 1.9<br>(1.47 - 2.34)  | 1.49<br>(1.2 - 1.86)  | 0.91<br>(0.74 - 1.27)   | 1.03<br>(0.68 - 1.44)   | 1.2<br>(0.91 - 1.52)  |

Supplementary Table 2 **Post exercise parametric values for different bone - tissue type combinations**

*Median parametric values from different bone tissue with interquartile range in parenthesis. Parameters obtained from dynamic scan started on average 8 minutes after step-up drop-land exercise.*
